# Supplementary material
Source: Springer Nature journal article supplement (https://www.springermedizin.de/resource/supplementary/12874_2014_1145_MOESM1_ESM.pdf/9433376)

## Income

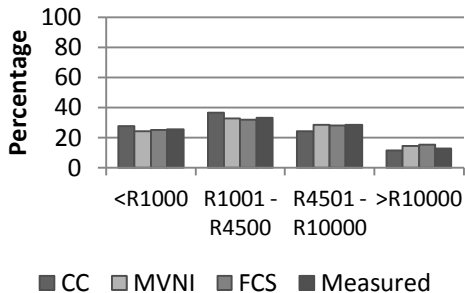

## Food

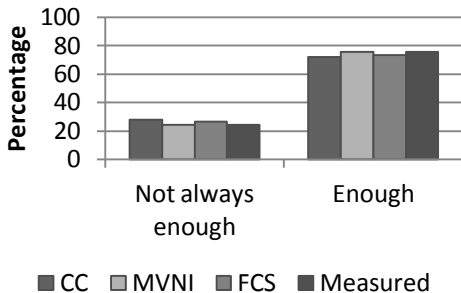

## Number of People

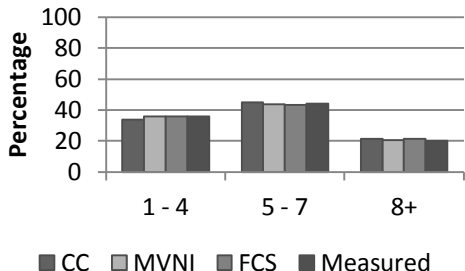

## Stove

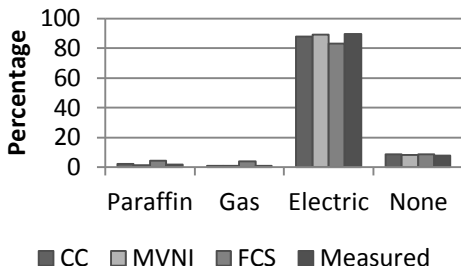

Supplement: MOESM1 [file 9433376]
